# Supplementary material for: Reduction of Nitroarenes into Aryl Amines and N-Aryl hydroxylamines via Activation of NaBH4 and Ammonia-Borane Complexes by Ag/TiO2 Catalyst
Source: PubMed Central journal article supplement (PMC5302523; doi:10.3390/nano6030054), 2016-03-22

# Supplementary Materials: Reduction of Nitroarenes into Aryl Amines and N-Aryl hydroxylamines via Activation of NaBH<sub>4</sub> and Ammonia-Borane Complexes by Ag/TiO<sub>2</sub> Catalyst

Dimitrios Andreou, Domna Iordanidou, Ioannis Tamiolakis, Gerasimos S. Armatas and Ioannis N. Lykakis

**Table S1.** Textural properties of mesoporous mesoporous TiO<sub>2</sub> nanoparticle assemblies (MTA) and Ag/MTA catalysts.

| Sample    | Ag loading <sup>a</sup><br>(wt %) | Surface area<br>(m <sup>2</sup> /g) | Pore volume<br>(cm <sup>3</sup> /g) | Pore size<br>(nm) |
|-----------|-----------------------------------|-------------------------------------|-------------------------------------|-------------------|
| MTA       |                                   | 149                                 | 0.27                                | 7.1               |
| 2% Ag/MTA | 2.1                               | 126                                 | 0.23                                | 7.1               |
| 3% Ag/MTA | 2.9                               | 128                                 | 0.23                                | 5.6, 7.3          |
| 4% Ag/MTA | 4.0                               | 125                                 | 0.22                                | 5.5, 7.4          |
| 7% Ag/MTA | 6.8                               | 119                                 | 0.21                                | 5.4, 7.4          |

<sup>a</sup> Weight percent of Ag loading according to the Energy dispersive X-ray spectroscopy (EDS) data.

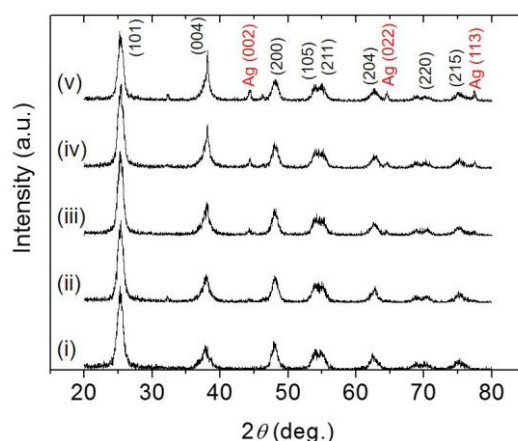

**Figure S1.** X-ray diffraction (XRD) patterns of mesoporous samples: (i) MTA; (ii) 2% Ag/MTA; (iii) 3% Ag/MTA; (iv) 4% Ag/MTA; and (v) 7% Ag/MTA.

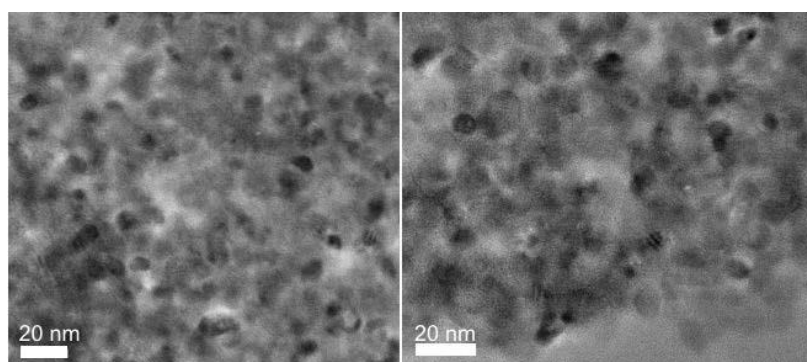

**Figure S2.** Typical transmission electron microscopy (TEM) images of mesoporous 4% Ag/MTA sample, showing that individual AgNPs (appeared as dark spots as evidenced by high resolution TEM (HRTEM) and fast Fourier transformation (FFT) analysis (see Figure 1c in the text)) are uniformly dispersed on the surface of TiO<sub>2</sub>.

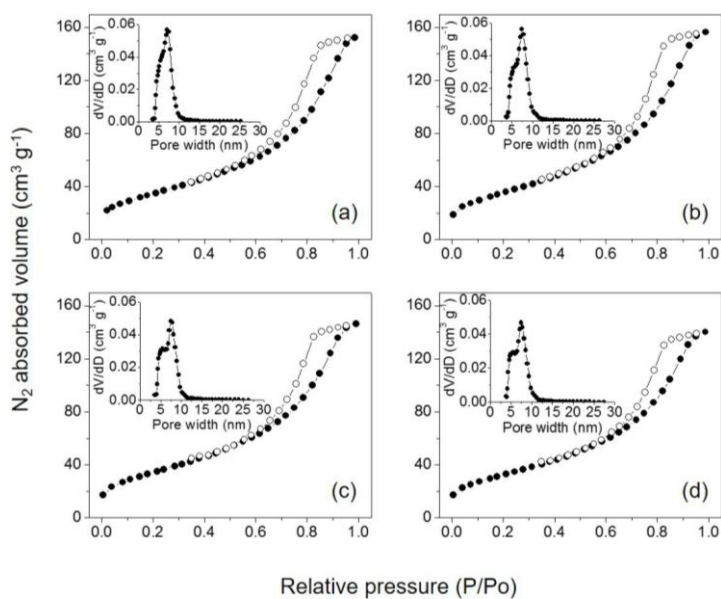

**Figure S3.** N<sub>2</sub> adsorption-desorption isotherms at 77 K and the corresponding non-local density functional theory (NLDFT) pore size distributions (insets) for the mesoporous: (a) 2% Ag/MTA; (b) 3% Ag/MTA; (c) 4% Ag/MTA; and (d) 7% Ag/MTA materials.

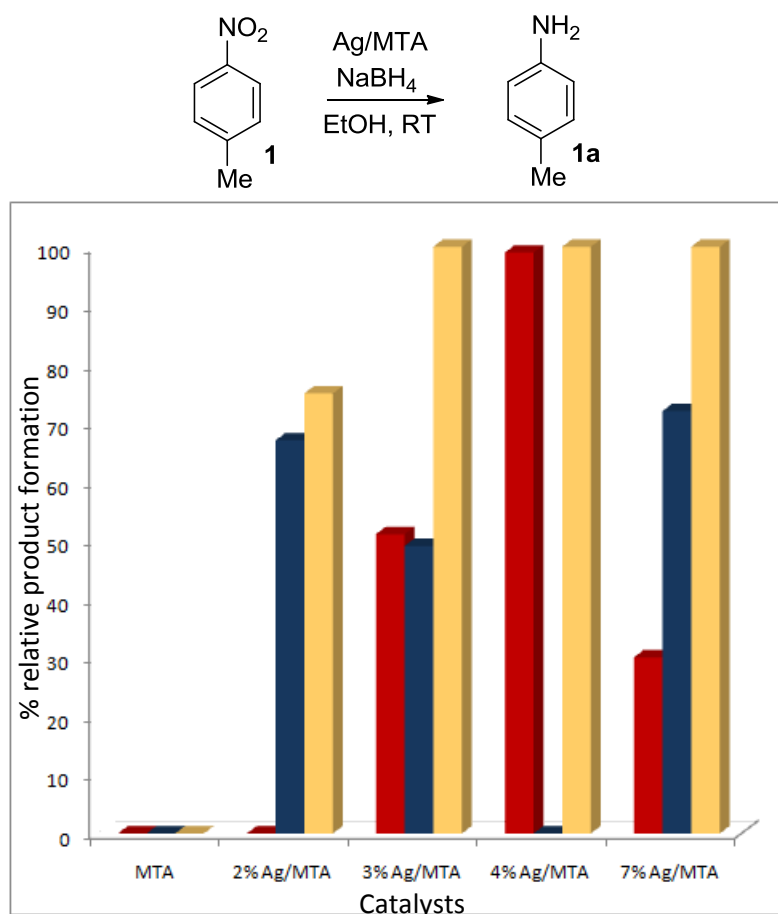

**Figure S4.** Catalysts evaluation based on the relative conversions of (1) to amine or to the condensation products azo, azoxy and hydrazo arenes, after 4 h. First (red) columns correspond to the relative yield of amine (1a); second (blue) columns correspond to the summary of the relative yields of the dimeric products; and third (yellow) columns correspond to the reaction conversion based on the consumption of 1.

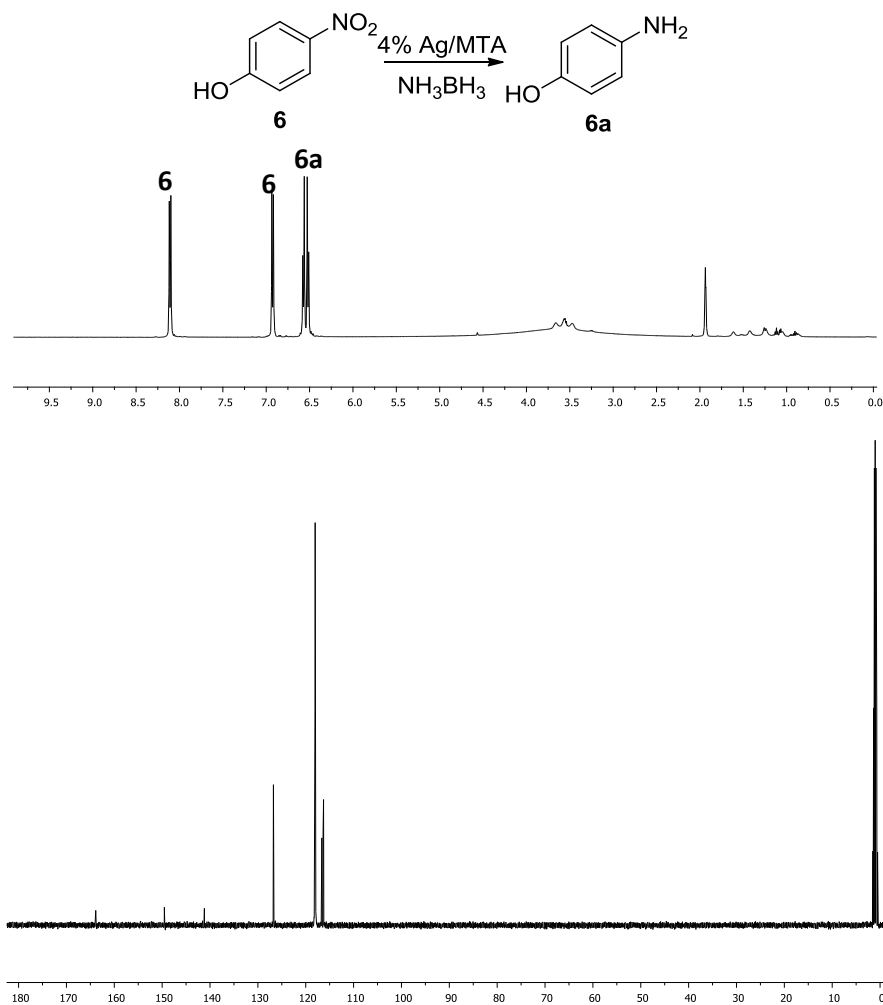

**Figure S5.**  $^1\text{H-NMR}$  and  $^{13}\text{C-NMR}$  of the crude mixture of the reduction of 6 in the presence of  $\text{NH}_3\text{BH}_3$  catalyzed by 4% Ag/MTA.

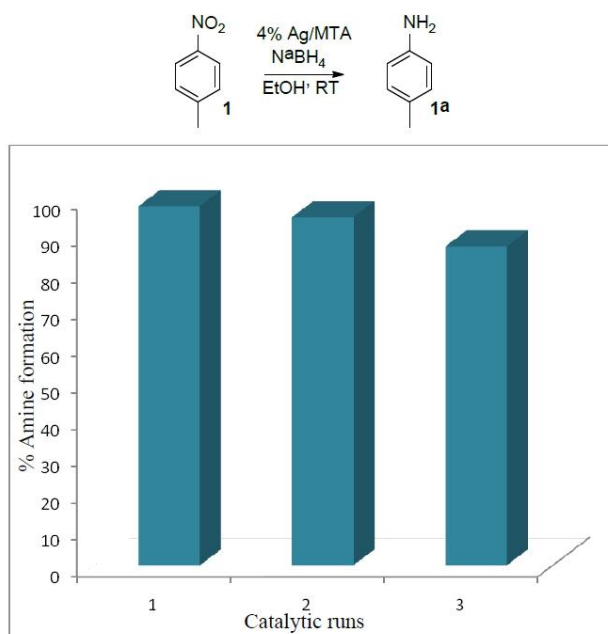

**Figure S6.** Recycling study of the mesoporous 4% Ag/MTA catalyst (Experimental conditions: 0.2 mmol of p-nitrotoluene, 20 mg of catalyst, 1.2 mmol of  $\text{NaBH}_4$ , 2 mL of ethanol, room temperature,  $t = 6$  h).

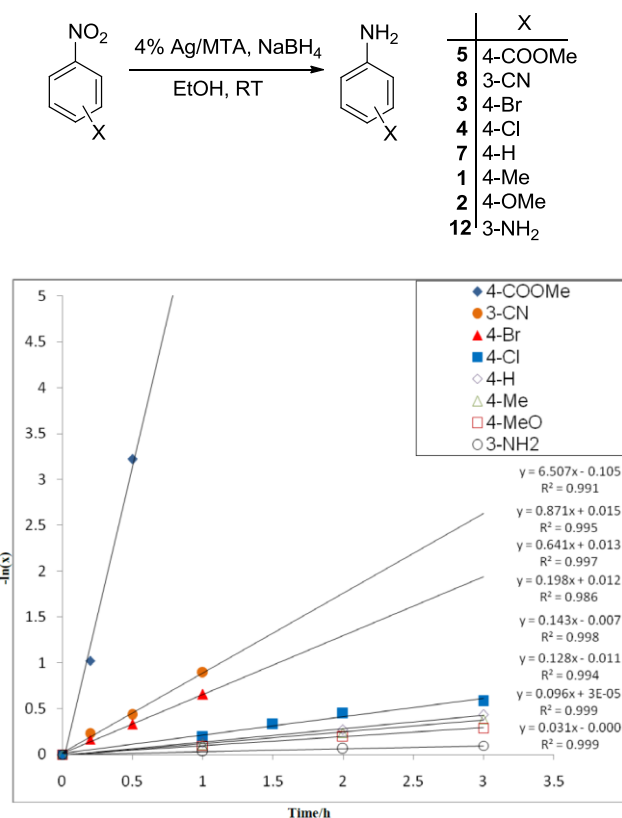

**Figure S7.** Kinetic plots for the nitroarenes **1**, **2**, **3**, **4**, **5**, **7**, **8** and **12** consumptions catalyzed by 4% Ag/MTA using NaBH<sub>4</sub> (4 mol-excess) as reducing agent.

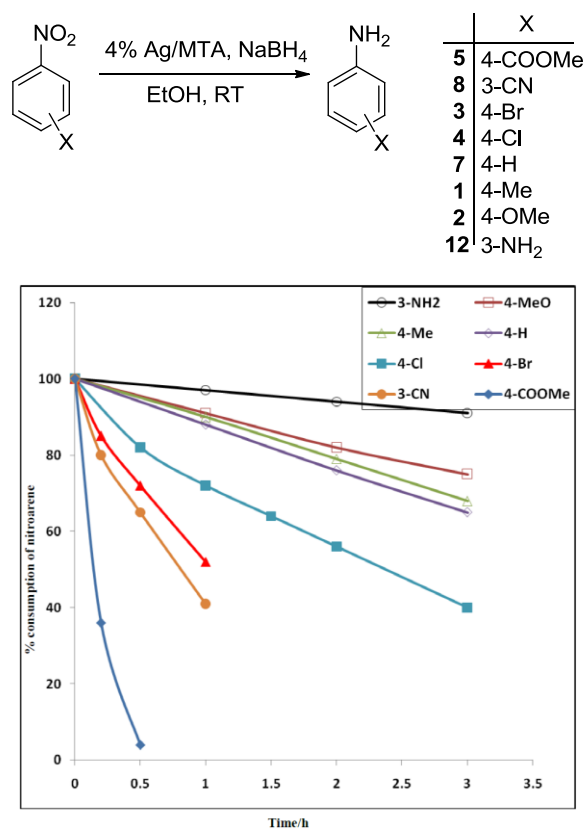

**Figure S8.** Profile of the nitroarenes **1**, **2**, **3**, **4**, **5**, **7**, **8** and **12** consumptions catalyzed by 4% Ag/MTA using NaBH<sub>4</sub> (4 mol-excess) as reducing agent.

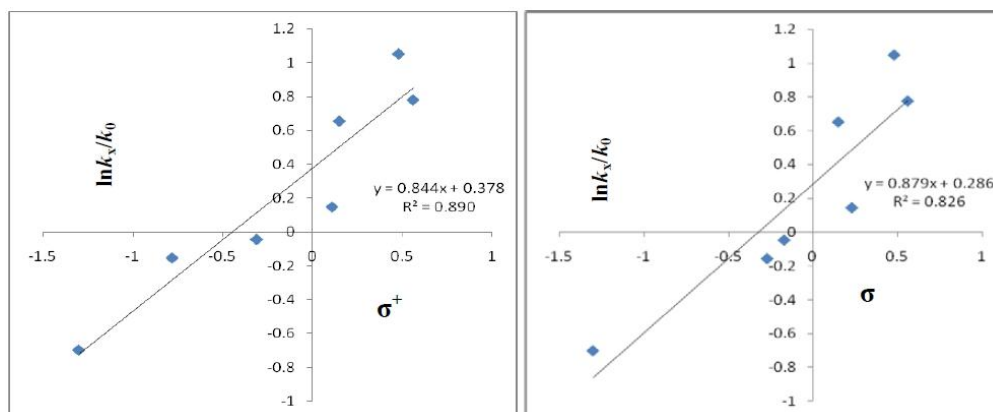

**Figure S9.** Hammett-type kinetic plots for the nitroarenes **1**, **2**, **3**, **4**, **5**, **8** and **12** reductions catalyzed by 4% Ag/MTA using  $\text{NaBH}_4$  as reducing agent. The values for  $\sigma^+$  and  $\sigma$  were taken from the textbook [1].

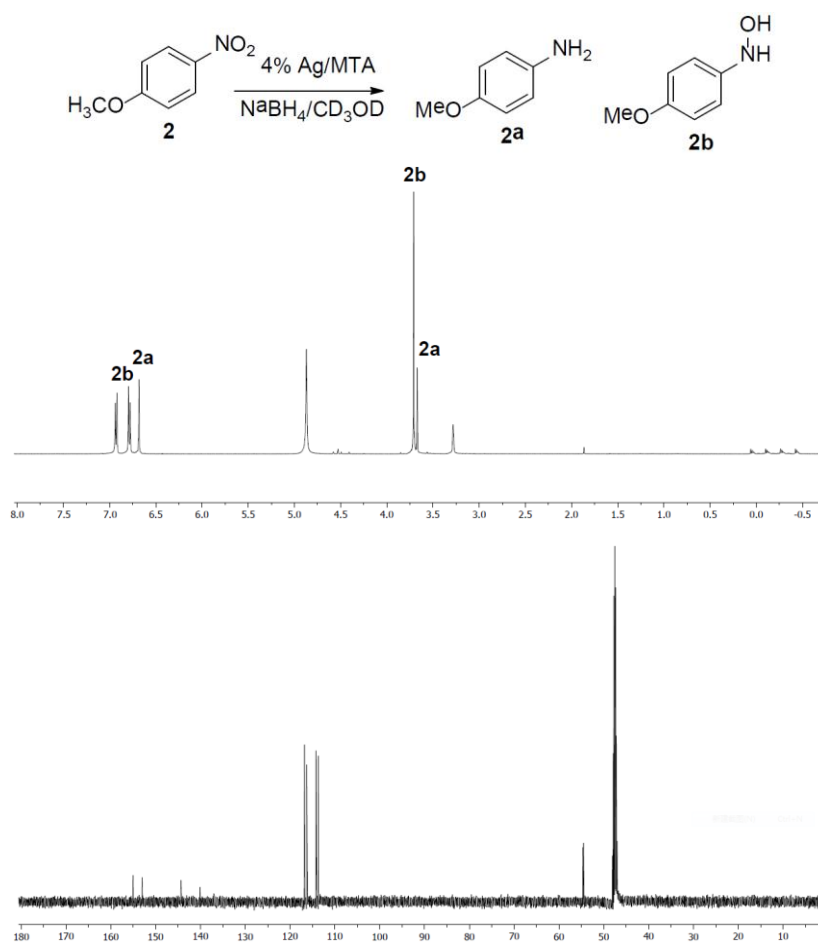

**Figure S10.**  $^1\text{H-NMR}$  and  $^{13}\text{C-NMR}$  of the crude mixture of the reduction of **2** in the presence of  $\text{NaBH}_4$  in  $\text{CD}_3\text{OD}$ , catalyzed by 4% Ag/MTA, at initial reaction time (<1 h).

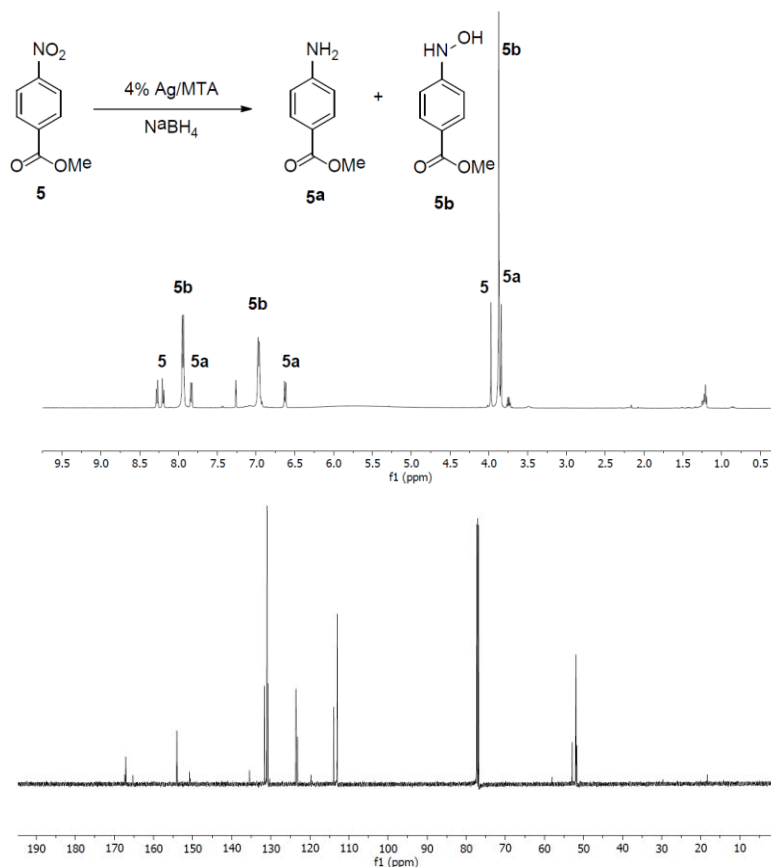

**Figure S11.**  $^1\text{H-NMR}$  and  $^{13}\text{C-NMR}$  of the crude mixture of the reduction of **5** in the presence of  $\text{NaBH}_4$ , catalyzed by 4% Ag/MTA, at initial reaction time (<0.5 h).

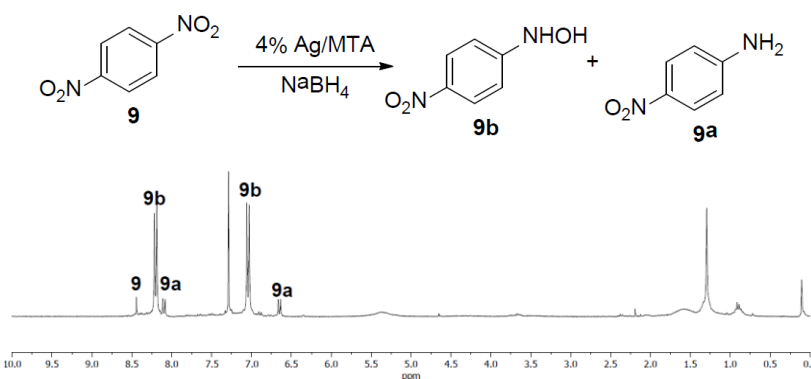

**Figure S12.**  $^1\text{H-NMR}$  of the crude mixture of the reduction of **9** in the presence of  $\text{NaBH}_4$ , catalyzed by 4% Ag/MTA, at initial reaction time (<0.5 h).

### $^1\text{H-NMR}$ and $^{13}\text{C-NMR}$ Data

#### Toluidine [2,3]

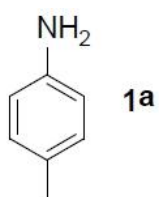

$^1\text{H-NMR}$  (300 MHz,  $\text{CDCl}_3$ ): 6.91 (d, 2H,  $J = 8.5$  Hz), 6.56 (d, 2H,  $J = 8.5$  Hz), 3.49 (br, 2H,  $-\text{NH}_2$ ), 2.19

(s, 3H);  $^{13}\text{C}$ -NMR (75 MHz,  $\text{CDCl}_3$ ): 143.6, 129.5, 127.6, 115.1, 20.2.

#### 4-Methoxyaniline [2]

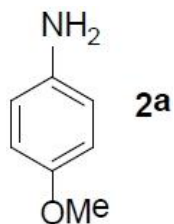

$^1\text{H}$ -NMR (300 MHz,  $\text{CDCl}_3$ ): 6.75 (d, 2H,  $J = 9$  Hz), 6.65 (d, 2H,  $J = 9$  Hz), 3.74 (s, 3H), 3.48 (br, 2H,  $-\text{NH}_2$ );  $^{13}\text{C}$ -NMR (75 MHz,  $\text{CDCl}_3$ ): 152.8, 139.9, 116.4, 114.7, 55.7.

#### 4-Bromoaniline [3]

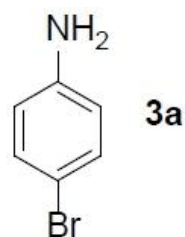

$^1\text{H}$ -NMR (300 MHz,  $\text{CDCl}_3$ ): 7.22 (d, 2H,  $J = 8.5$  Hz), 6.53 (d, 2H,  $J = 8.5$  Hz), 3.65 (br, 2H,  $-\text{NH}_2$ );  $^{13}\text{C}$ -NMR (75 MHz,  $\text{CDCl}_3$ ): 145.4, 132.0, 116.7, 110.2.

#### 4-Chloroaniline [3]

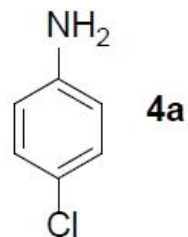

$^1\text{H}$ -NMR (300 MHz,  $\text{CDCl}_3$ ): 7.04 (d, 2H,  $J = 8.5$  Hz), 6.64 (d, 2H,  $J = 8.5$  Hz), 3.62 (br, 2H,  $-\text{NH}_2$ );  $^{13}\text{C}$ -NMR (75 MHz,  $\text{CDCl}_3$ ): 144.8, 128.9, 123.0, 116.0.

#### Methyl 4-aminobenzoate [4]

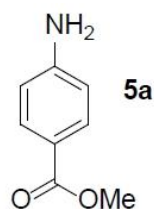

$^1\text{H}$ -NMR (300 MHz,  $\text{CDCl}_3$ ): 7.83 (d, 2H,  $J = 8.5$  Hz), 6.62 (d, 2H,  $J = 8.5$  Hz), 4.09 (br, 2H,  $-\text{NH}_2$ ), 3.84 (s, 3H);  $^{13}\text{C}$ -NMR (75 MHz,  $\text{CDCl}_3$ ): 167.2, 150.8, 131.5, 119.8, 113.7, 51.5.

#### 4-Aminophenol [3]

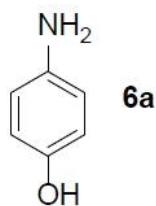

$^1\text{H-NMR}$  (300 MHz,  $\text{CD}_3\text{OD}$ ): 6.56 (d, 2H,  $J = 9$  Hz), 6.51 (d, 2H,  $J = 9$  Hz), 3.40 (br, 2H,  $-\text{NH}_2$ );  $^{13}\text{C-NMR}$  (75 MHz,  $\text{CD}_3\text{OD}$ ): 149.7, 141.7, 116.8, 116.7.

#### Aniline [2]

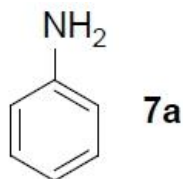

$^1\text{H-NMR}$ : (300 MHz,  $\text{CDCl}_3$ ): 7.13 (t, 2H,  $J = 8.5$  Hz), 6.73 (t, 1H,  $J = 8.5$  Hz), 6.65 (d, 2H,  $J = 8.5$  Hz), 3.42 (br, 2H,  $-\text{NH}_2$ );  $^{13}\text{C-NMR}$ : (75 MHz,  $\text{CDCl}_3$ ): 146.2, 129.0, 118.3, 114.9.

#### 3-Aminobenzonitrile [5]

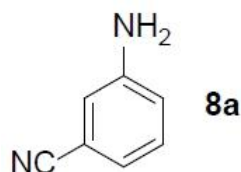

$^1\text{H-NMR}$  (300 MHz,  $\text{CDCl}_3$ ): 7.18 (t, 1H,  $J = 7.5$  Hz), 6.96 (d, 1H,  $J = 7.5$  Hz), 6.89 (s, 1H), 6.85 (d, 1H,  $J = 7.5$  Hz), 3.86 (br, 2H,  $-\text{NH}_2$ );  $^{13}\text{C-NMR}$  (75 MHz,  $\text{CDCl}_3$ ): 146.9, 129.9, 121.8, 119.2, 119.1, 117.5, 112.9.

#### 4-Aminoaniline [2]

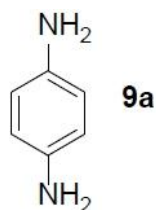

$^1\text{H-NMR}$  (300 MHz,  $\text{CDCl}_3$ ): 6.56 (s, 4H), 3.19 (br, 4H,  $-\text{NH}_2$ );  $^{13}\text{C-NMR}$  (75 MHz,  $\text{CDCl}_3$ ): 138.6, 116.7.

#### 6-aminoisobenzofuran-1(3H)-one [6]

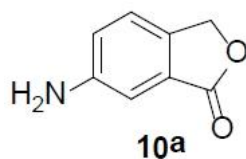

$^1\text{H-NMR}$  (300 MHz,  $\text{CDCl}_3$ ): 7.21 (d, 1H,  $J = 8.0$  Hz), 7.13 (d, 1H,  $J = 2.0$  Hz), 6.95 (dd, 1H,  $J_1 = 8.0$  Hz,  $J_2 = 2.0$  Hz), 5.20 (s, 2H), 3.92 (s, 2H);  $^{13}\text{C-NMR}$  (125 MHz,  $\text{CDCl}_3$ ): 171.4, 147.5, 136.4, 127.0, 122.7, 121.6, 109.8, 69.6.



**3-Ethylaniline [2,3]**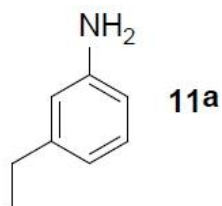

$^1\text{H-NMR}$  (300 MHz,  $\text{CDCl}_3$ ): 7.07 (t, 1H,  $J = 7.5$  Hz), 6.61 (d, 1H,  $J = 7.5$  Hz), 6.54 (s, 1H), 6.51 (d, 1H,  $J = 7.5$  Hz), 3.56 (s, 2H), 2.56 (q, 2H,  $J = 7$  Hz), 1.21 (t, 3H,  $J = 7$  Hz).

**1-Ethyl-3-nitrobenzene**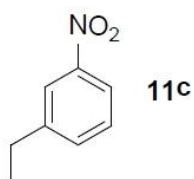

$^1\text{H-NMR}$  (300 MHz,  $\text{CDCl}_3$ ): 7.76-7.72 (m, 1H), 7.43 (t, 1H,  $J = 7.7$  Hz), 7.31 (d, 2H,  $J = 7.7$  Hz), 2.77 (q, 2H,  $J = 7.5$  Hz), 1.32 (t, 3H,  $J = 7.5$  Hz).

**3-amino aniline [3,4]**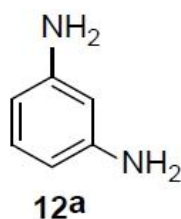

$^1\text{H-NMR}$  (500 MHz,  $\text{CDCl}_3$ ): 6.94 (t, 1H,  $J = 7.9$  Hz), 6.12 (dd, 2H,  $J_1 = 7.9$  Hz,  $J_2 = 2.0$  Hz), 6.04 (t, 1H,  $J = 2.0$  Hz), 3.56 (br, 4H,  $-\text{NH}_2$ );  $^{13}\text{C-NMR}$  (125 MHz,  $\text{CDCl}_3$ ): 147.5, 130.2, 106.0, 101.9.

**N-(p-tolyl)hydroxylamine [7,8]**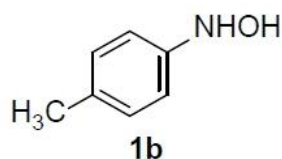

$^1\text{H-NMR}$  (300 MHz,  $\text{CDCl}_3$ ): 7.09 (d, 2H,  $J = 8.4$  Hz), 6.92 (d, 2H,  $J = 8.4$  Hz), 2.30.  $^{13}\text{C-NMR}$  (75 MHz,  $\text{CDCl}_3$ ): 147.3, 132.0, 129.5, 115.2, 20.6.

**N-(4-methoxyphenyl)hydroxylamine [7,8]**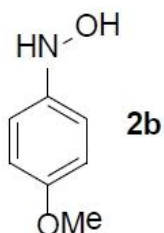

$^1\text{H-NMR}$  (300 MHz,  $\text{CD}_3\text{OD}$ ): 6.94 (d, 2H,  $J = 9$  Hz), 6.80 (d, 2H,  $J = 9$  Hz), 3.72 (s, 3H);  $^{13}\text{C-NMR}$  (125 MHz,  $\text{CD}_3\text{OD}$ ): 156.5, 145.8, 118.3, 115.7, 56.1; MS  $m/z$  (ESI) calcd for  $\text{C}_7\text{H}_9\text{NO}_2$  (M-H) $^+$  138.06,

found 137.85.

### N-(4-bromophenyl)hydroxylamine [7]

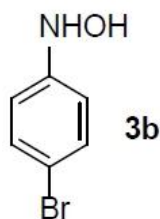

$^1\text{H-NMR}$  (300 MHz,  $\text{CDCl}_3$ ): 7.38 (d, 2H,  $J = 8.7$  Hz), 6.88 (d, 2H,  $J = 8.7$  Hz), 5.51 (br, 1H).  $^{13}\text{C-NMR}$  (75 MHz,  $\text{CDCl}_3$ ): 148.9, 131.9, 116.2, 114.5.

### N-(4-chlorophenyl)hydroxylamine [7]

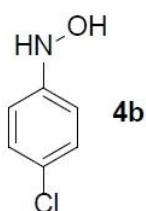

$^1\text{H-NMR}$  (300 MHz,  $\text{CDCl}_3$ ): 7.24 (d, 2H,  $J = 8.8$  Hz), 6.93 (d, 2H,  $J = 8.8$  Hz).  $^{13}\text{C-NMR}$  (75 MHz,  $\text{CDCl}_3$ ): 148.3, 128.9, 127.2, 115.9.  $^1\text{H-NMR}$  (500 MHz,  $\text{CD}_3\text{OD}$ ): 7.17 (d, 2H,  $J = 8.5$  Hz), 6.93 (d, 2H,  $J = 8.5$  Hz);  $^{13}\text{C-NMR}$  (125 MHz,  $\text{CD}_3\text{OD}$ ): 151.8, 129.5, 126.2, 116.2. MS  $m/z$  (ESI) calcd for  $\text{C}_6\text{H}_6\text{NOCl}$  (M-H) $^+$  142.56, found 142.41.

### Methyl 4-(hydroxyamino)benzoate [7]

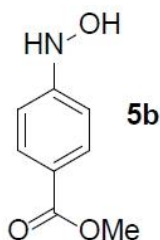

$^1\text{H-NMR}$  (300 MHz,  $\text{CDCl}_3$ ): 7.96 (d, 2H,  $J = 8.4$  Hz), 6.98 (d, 2H,  $J = 8.4$  Hz), 3.88.  $^{13}\text{C-NMR}$  (75 MHz,  $\text{CDCl}_3$ ): 167.0, 154.0, 131.0, 123.5, 113.0, 51.8.  $^1\text{H-NMR}$  (300 MHz,  $\text{CD}_3\text{OD}$ ): 7.85 (d, 2H,  $J = 8.5$  Hz), 6.93 (d, 2H,  $J = 8.5$  Hz), 3.87 (s, 3H). MS  $m/z$  (ESI) calcd for  $\text{C}_8\text{H}_9\text{NO}_3$  (M-H) $^+$  166.05, found 165.90.

### N-phenylhydroxylamine [7]

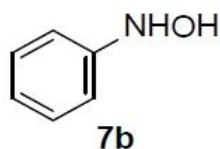

$^1\text{H-NMR}$  (300 MHz,  $\text{CDCl}_3$ ): 7.31–7.28 (m, 2H), 7.02–6.97 (m, 3H).  $^{13}\text{C-NMR}$  (75 MHz,  $\text{CDCl}_3$ ): 149.7, 128.9, 122.4, 114.8.

### 3-(Hydroxyamino)benzotrile [7,8]

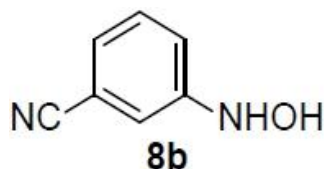

$^1\text{H-NMR}$  (500 MHz,  $\text{CDCl}_3$ ): 7.34 (t, 1H,  $J = 8.0$  Hz), 7.29 (s, 1H), 7.23 (d, 1H,  $J = 8.0$  Hz), 7.15 (d, 1H,  $J = 8.0$  Hz).  $^{13}\text{C-NMR}$  (125 MHz,  $\text{CDCl}_3$ ): 150.4, 129.6, 125.5, 118.9, 118.3, 117.1, 112.7. MS  $m/z$  (ESI) calcd for  $\text{C}_7\text{H}_6\text{N}_2\text{O}$  (M-H) $^+$  133.04, found 132.95.

#### N-(4-nitrophenyl)hydroxylamine [7]

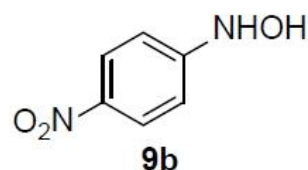

$^1\text{H-NMR}$  (300 MHz, Acetone- $d_6$ ): 8.11 (d, 2H,  $J = 9.2$  Hz), 7.03 (d, 2H,  $J = 9.2$  Hz).  $^{13}\text{C-NMR}$  (75 MHz, Acetone- $d_6$ ): 157.9, 140.7, 126.0, 112.0.

#### 6-(hydroxyamino)isobenzofuran-1(3H)-one [7,8]

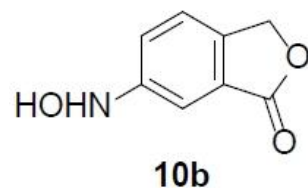

$^1\text{H-NMR}$  (500 MHz, Acetone- $d_6$ ): 8.15 (br, 1H), 7.46 (d, 1H,  $J = 8.3$  Hz), 7.39 (s, 1H,  $J = 2.0$  Hz), 7.31 (dd, 1H,  $J_1 = 8.3$  Hz,  $J_2 = 1.7$  Hz), 5.27 (s, 2H).  $^{13}\text{C-NMR}$  (125 MHz, Acetone- $d_6$ ): 171.7, 148.6, 139.7, 127.2, 123.5, 120.9, 108.7, 70.3.

#### N-(3-Vinylphenyl)hydroxylamine [7]

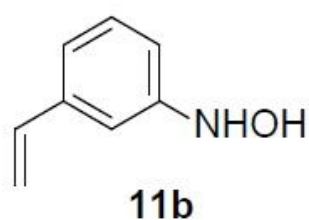

$^1\text{H-NMR}$  (500 MHz,  $\text{CD}_3\text{OD}$ ): 7.16 (t, 1H,  $J = 7.5$  Hz), 7.05 (s, 1H), 6.93 (d, 1H,  $J = 7.5$  Hz), 6.84 (d, 1H,  $J = 7.5$  Hz), 6.67 (dd, 1H,  $J_1 = 18$  Hz,  $J_2 = 12$  Hz), 5.69 (d, 1H,  $J = 18$  Hz), 5.15 (d, 1H,  $J = 12$  Hz);  $^{13}\text{C-NMR}$  (125 MHz,  $\text{CD}_3\text{OD}$ ): 153.0, 139.8, 138.6, 130.2, 120.2, 116.4, 114.2, 113.3; MS  $m/z$  (ESI) calcd for  $\text{C}_8\text{H}_9\text{NO}$  (M-H) $^+$  134.06, found 133.95.

#### 3-N-hydroxyl-aniline [7,8]

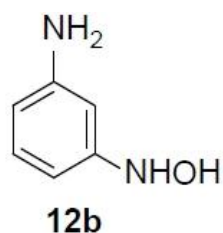

$^1\text{H-NMR}$  (500 MHz,  $\text{CDCl}_3$ ): 7.04 (t, 1H,  $J = 8.0$  Hz), 6.38 (s, 1H), 6.36 (d, 1H,  $J = 8.0$  Hz), 6.31 (d,  $J = 8.0$  Hz);  $^{13}\text{C-NMR}$  (125 MHz,  $\text{CDCl}_3$ ): 151.0, 147.2, 129.8, 109.2, 104.9, 101.4

### $^1\text{H-NMR}$ and $^{13}\text{C-NMR}$ Spectra

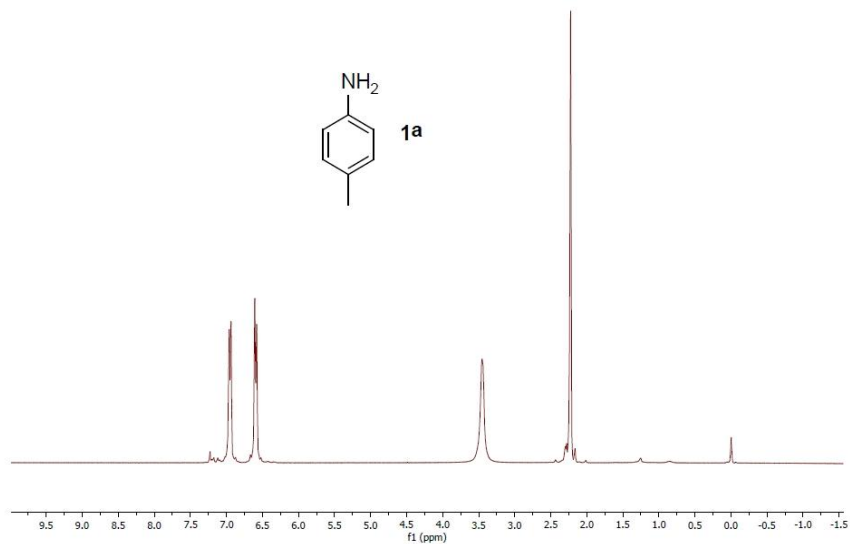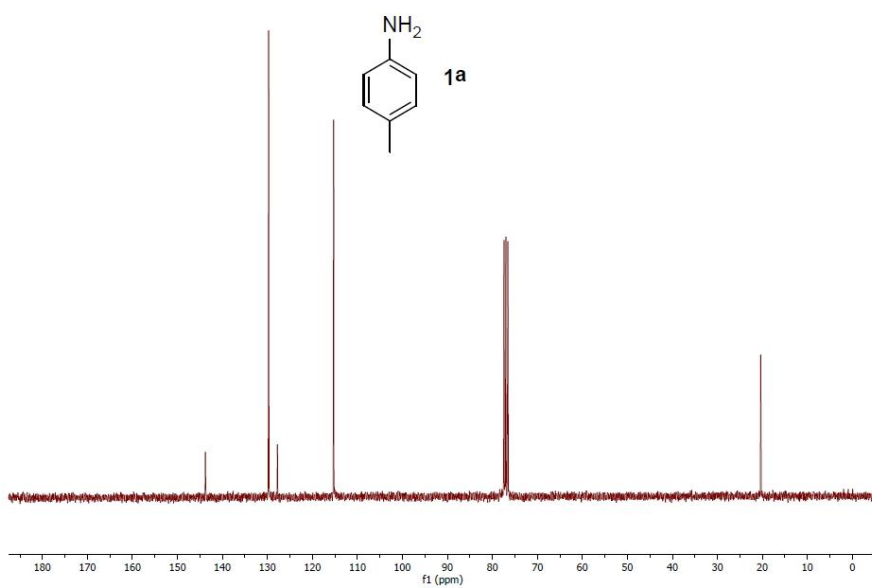

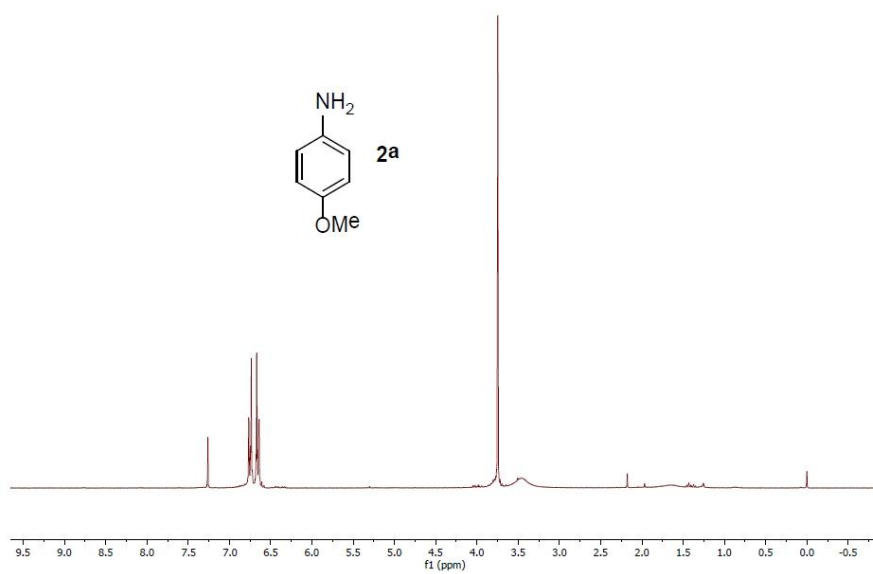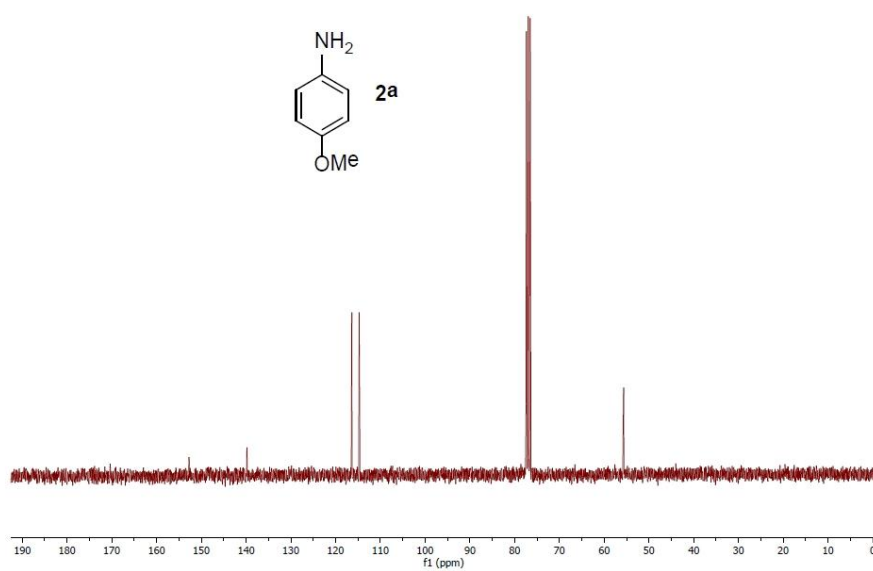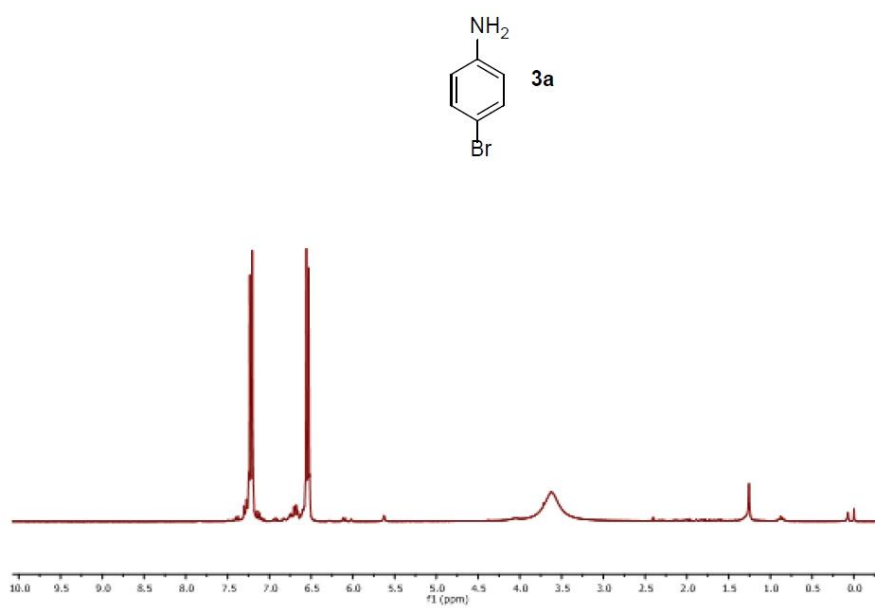

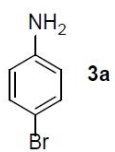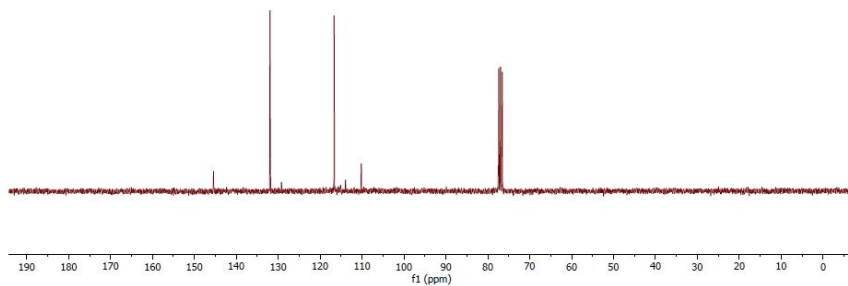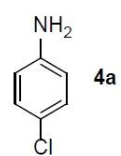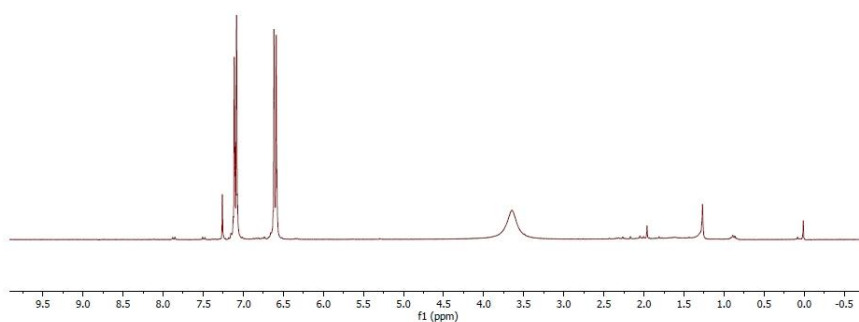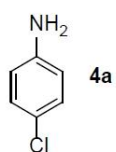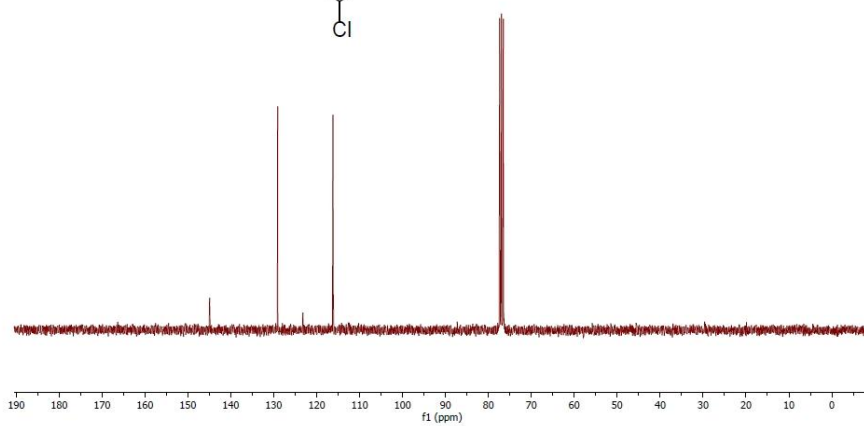

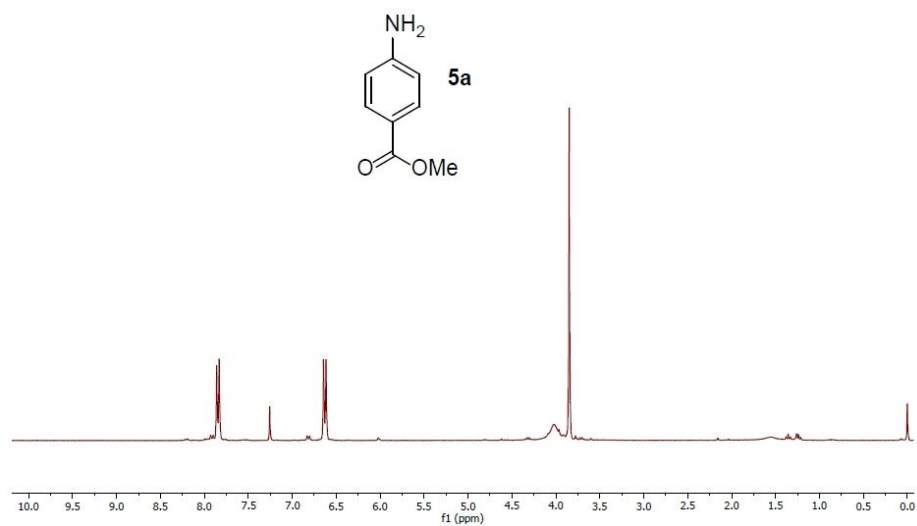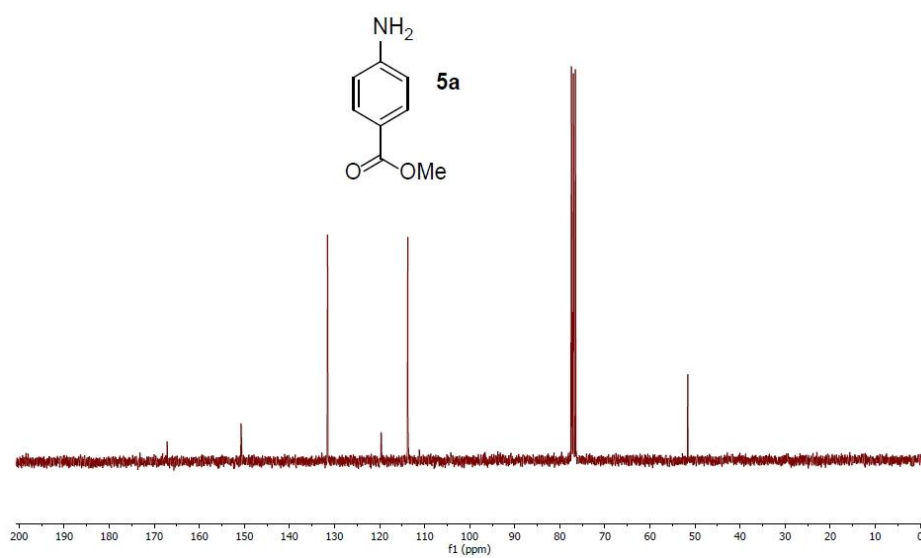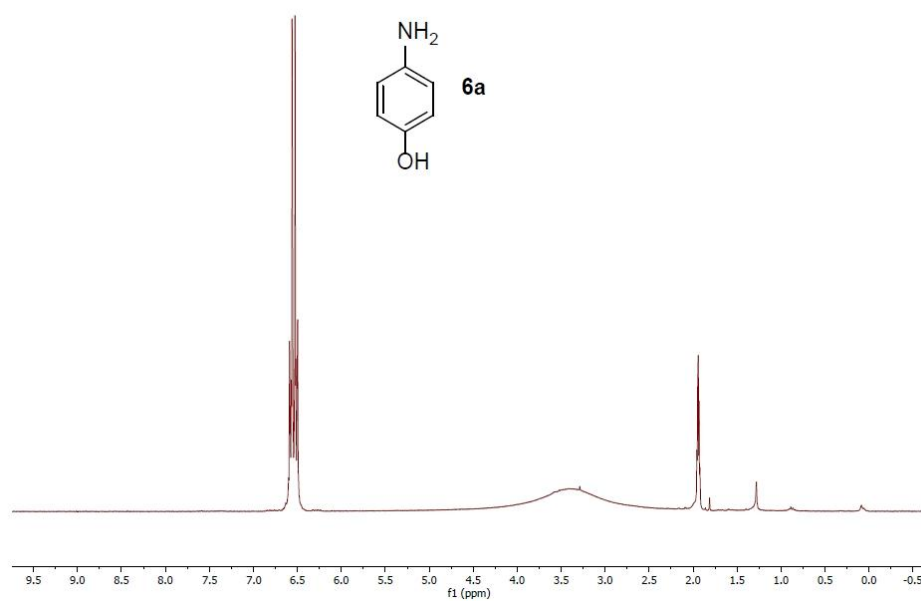

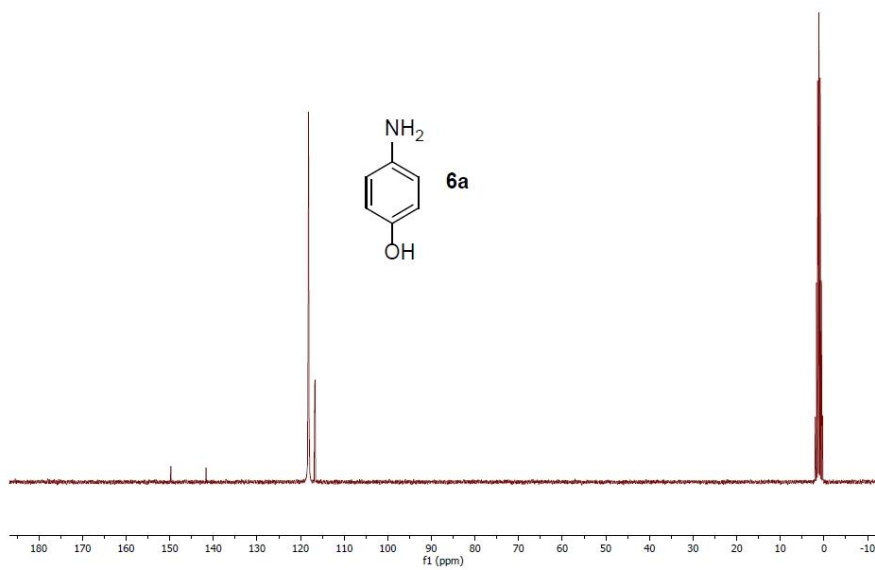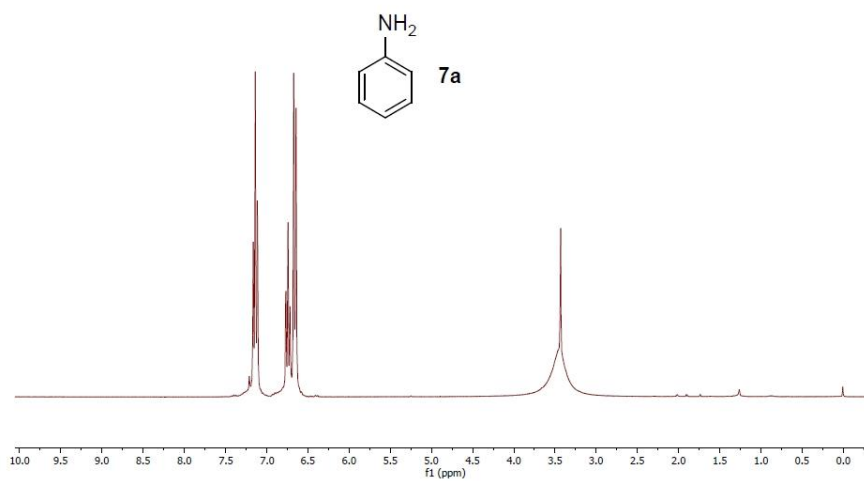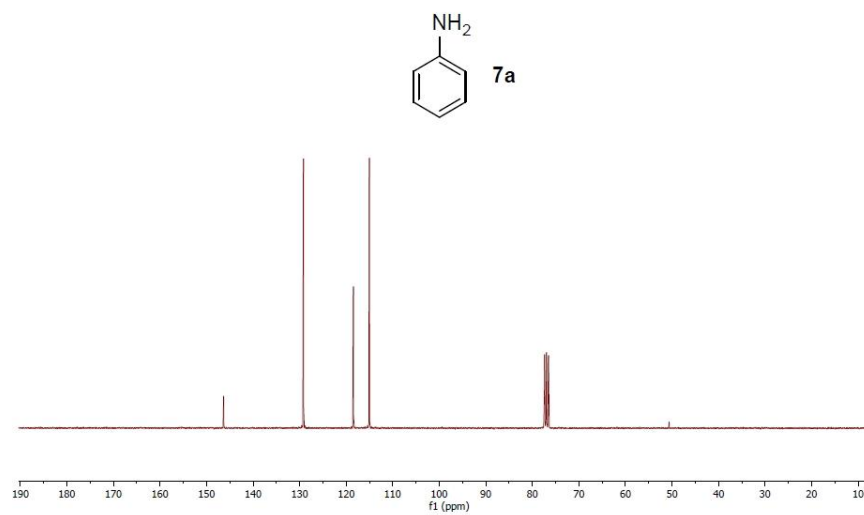



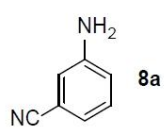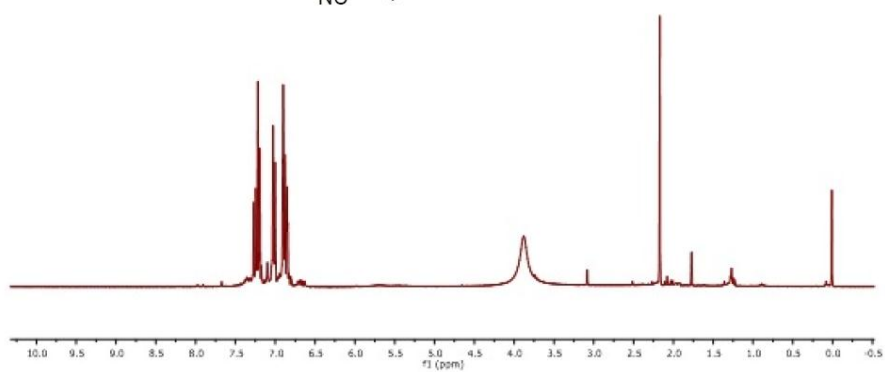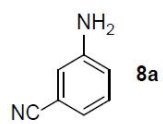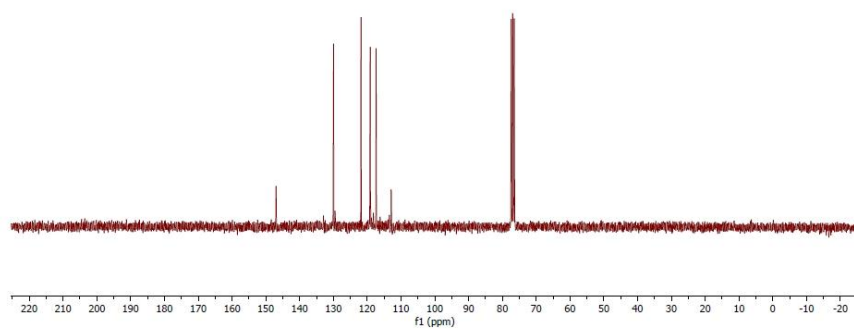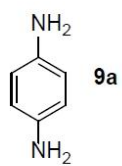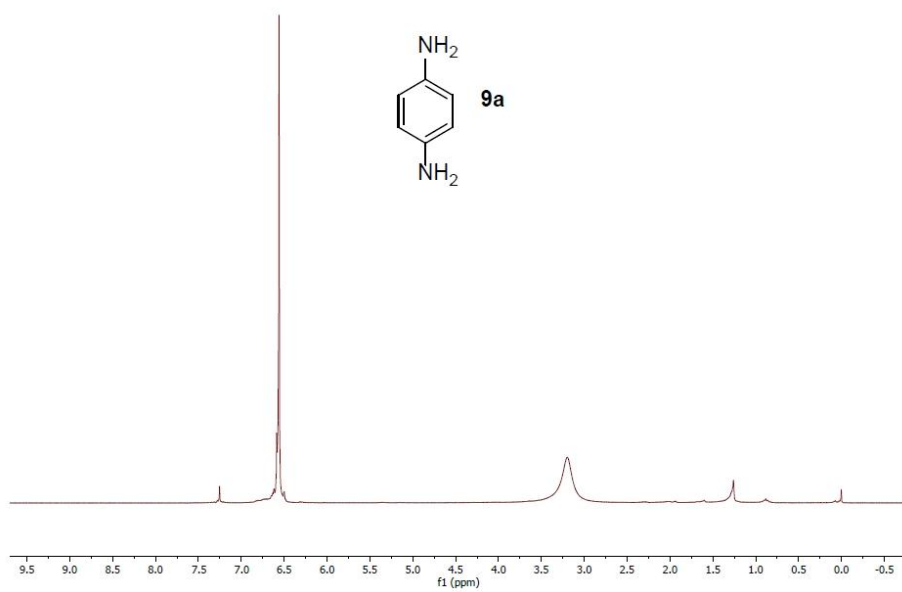

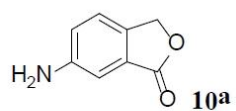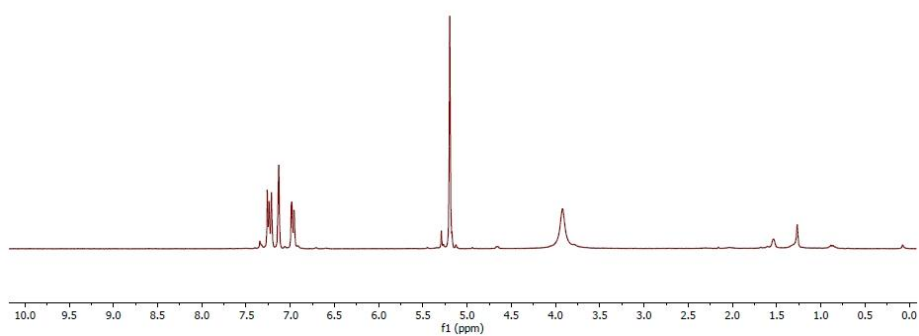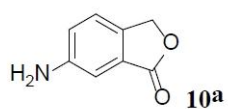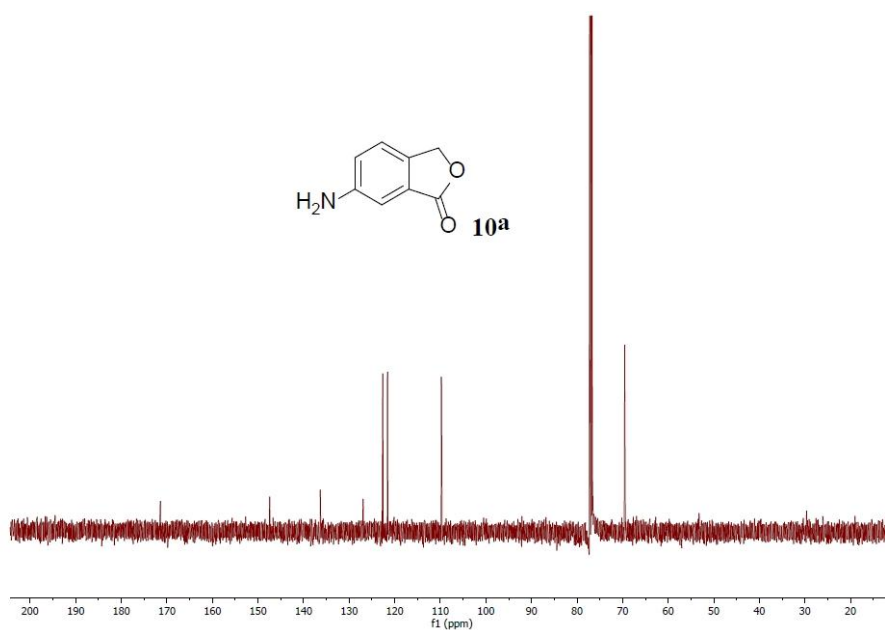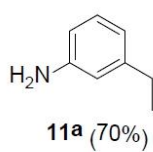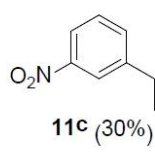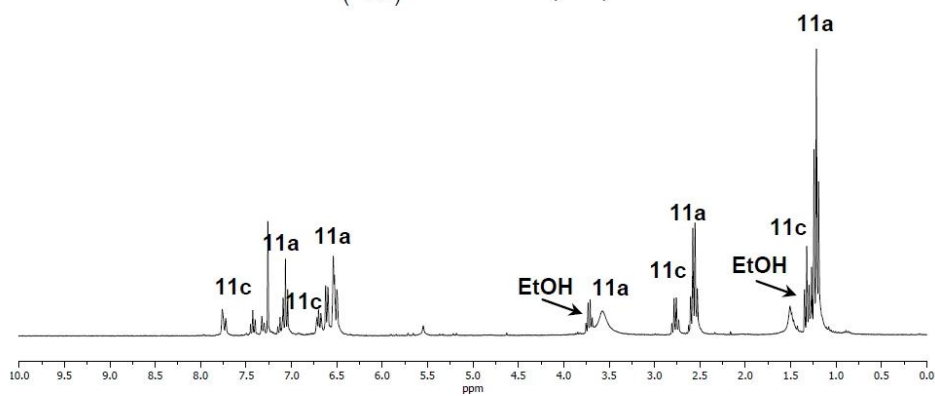

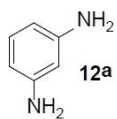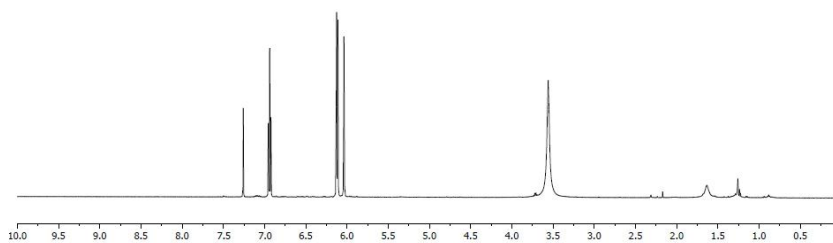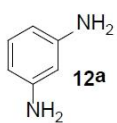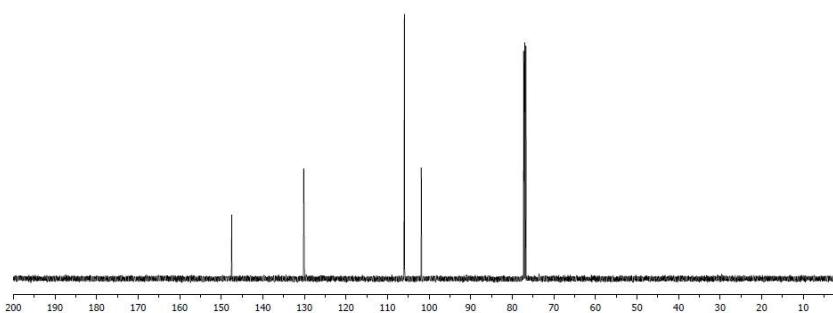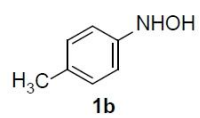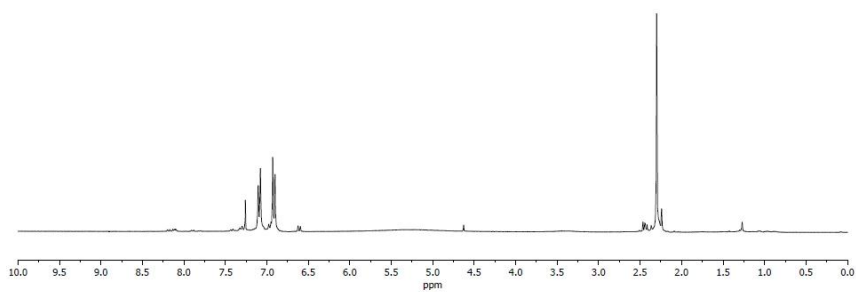

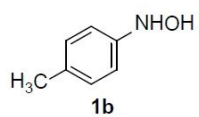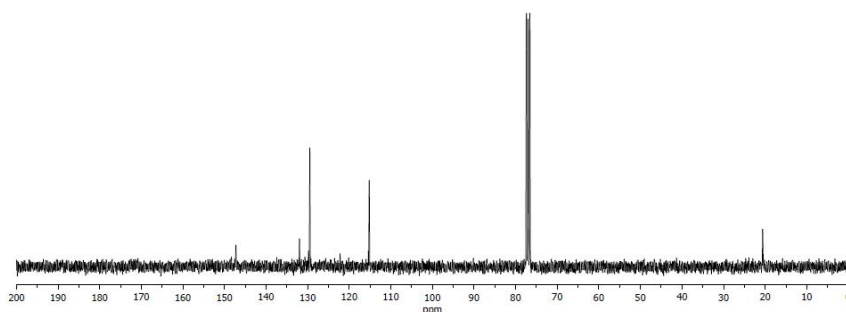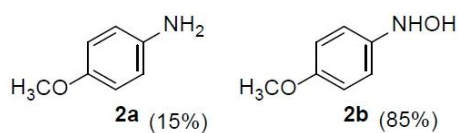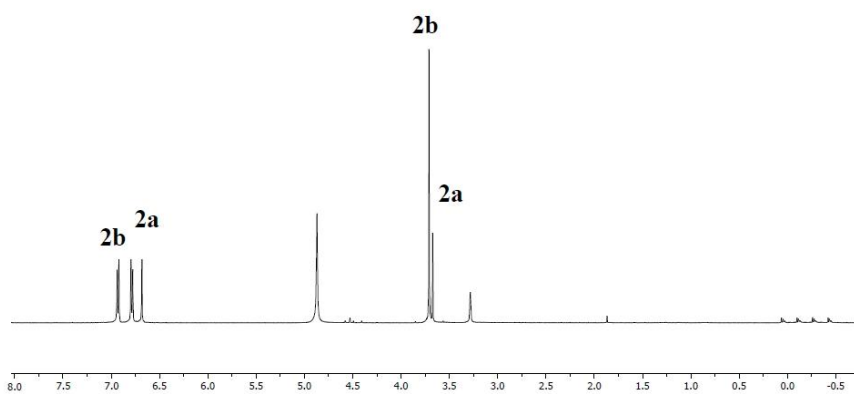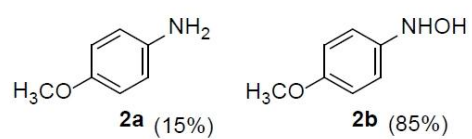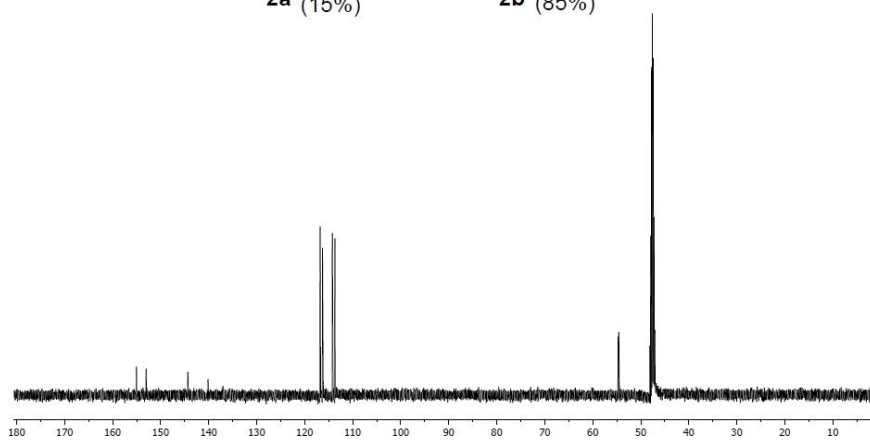

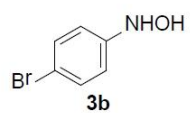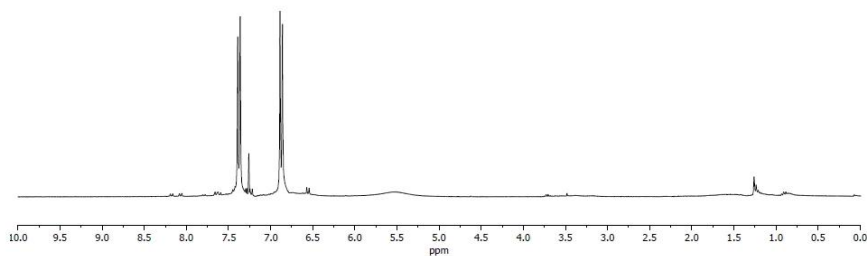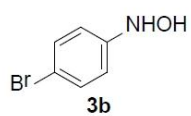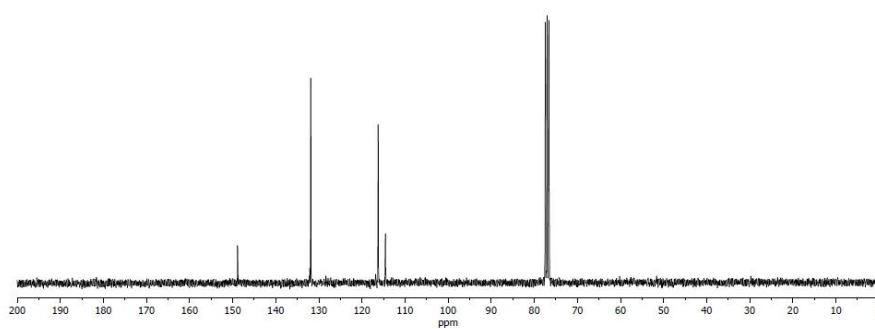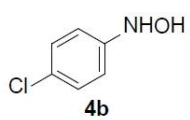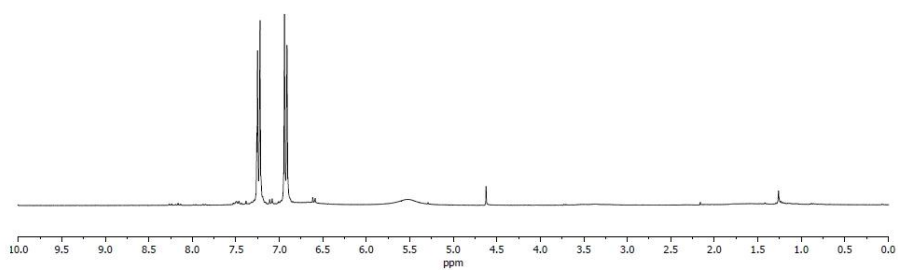

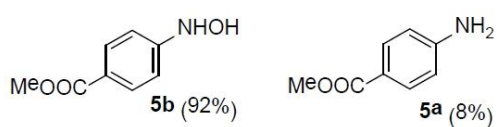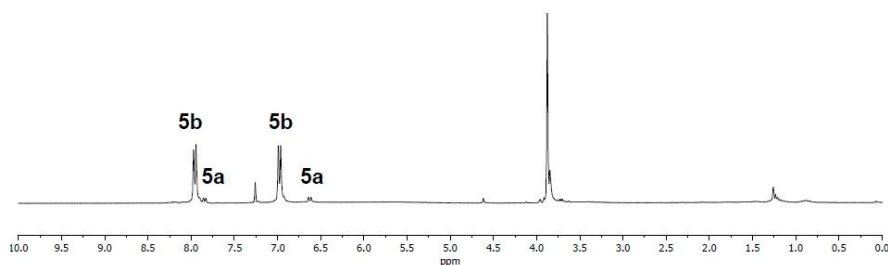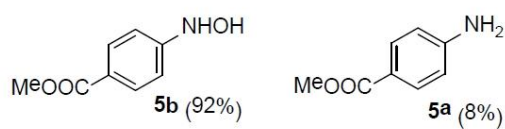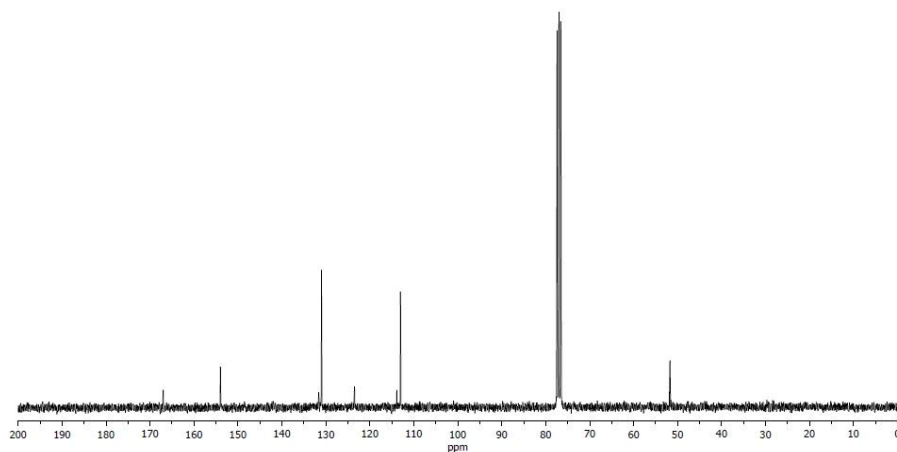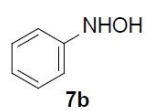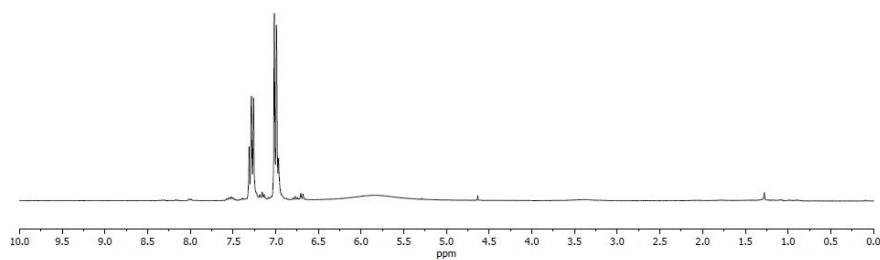

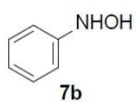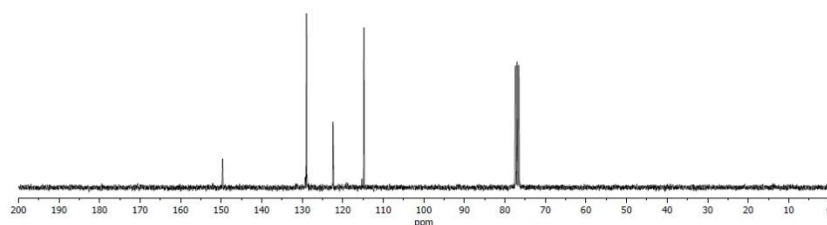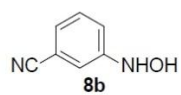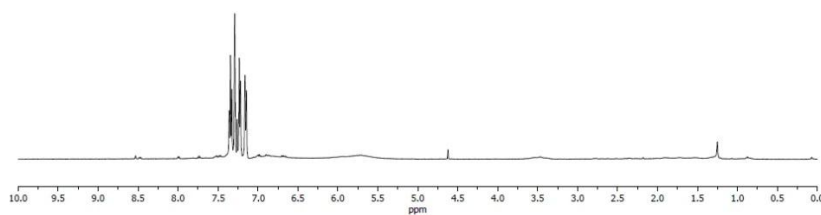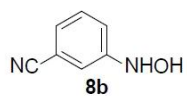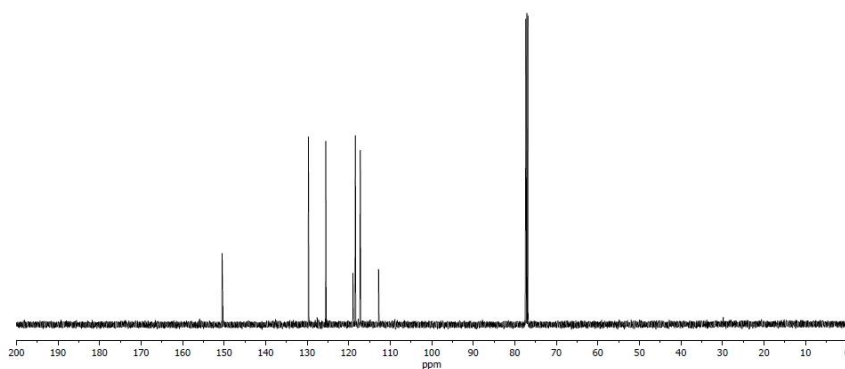

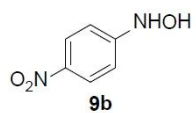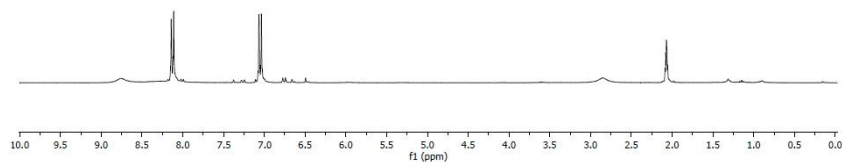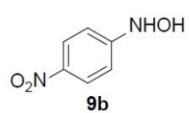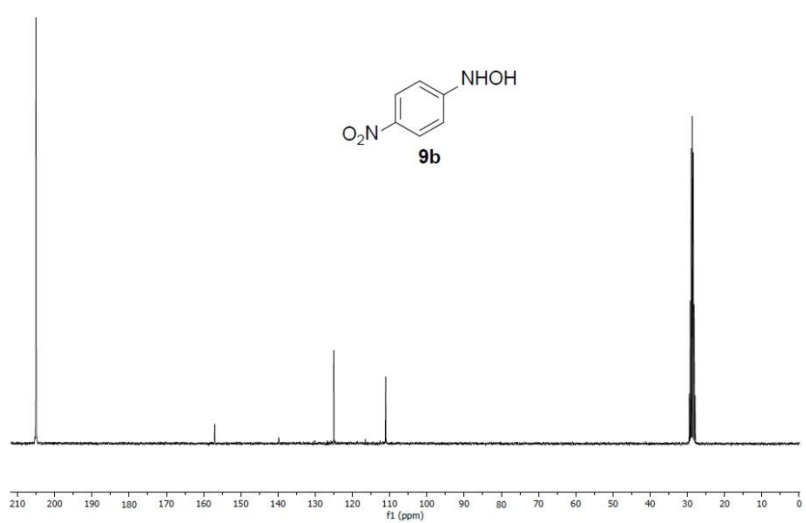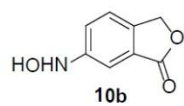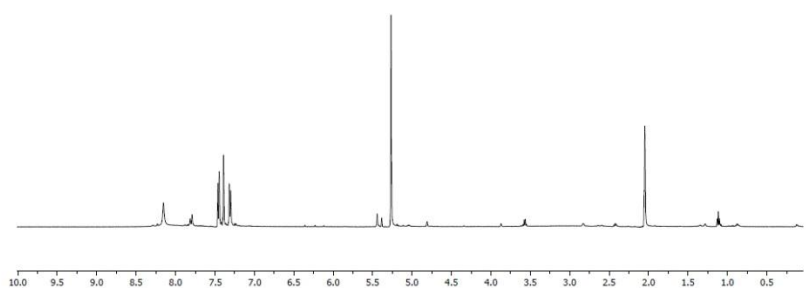



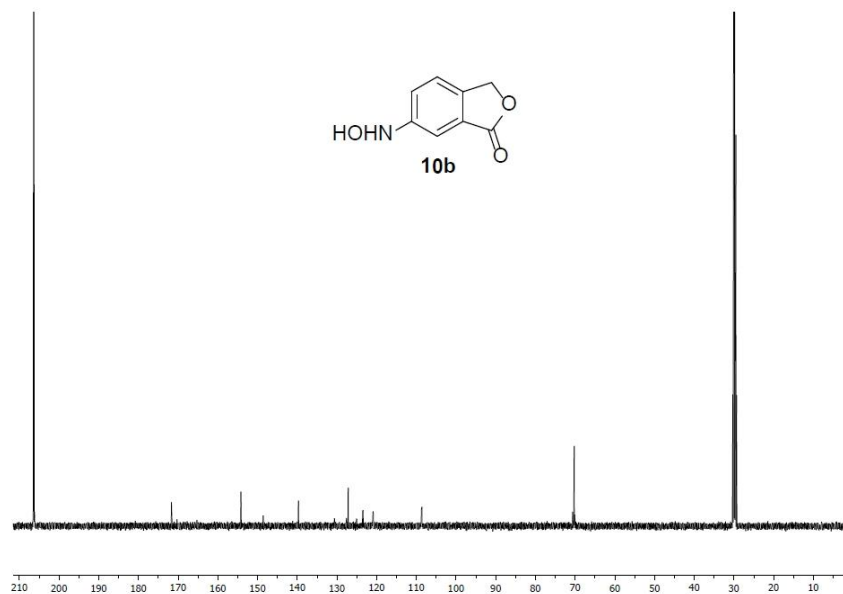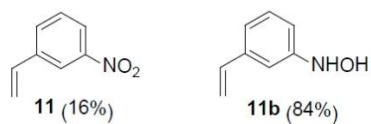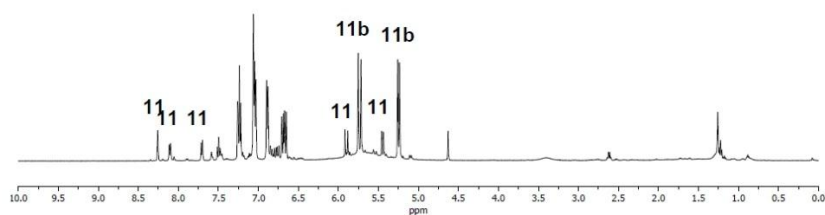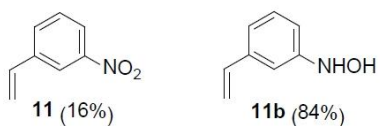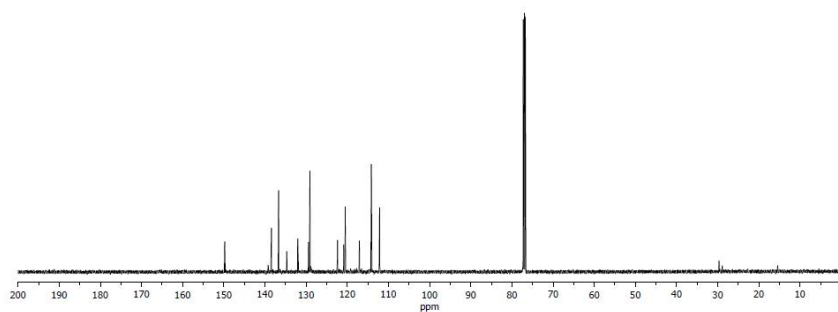

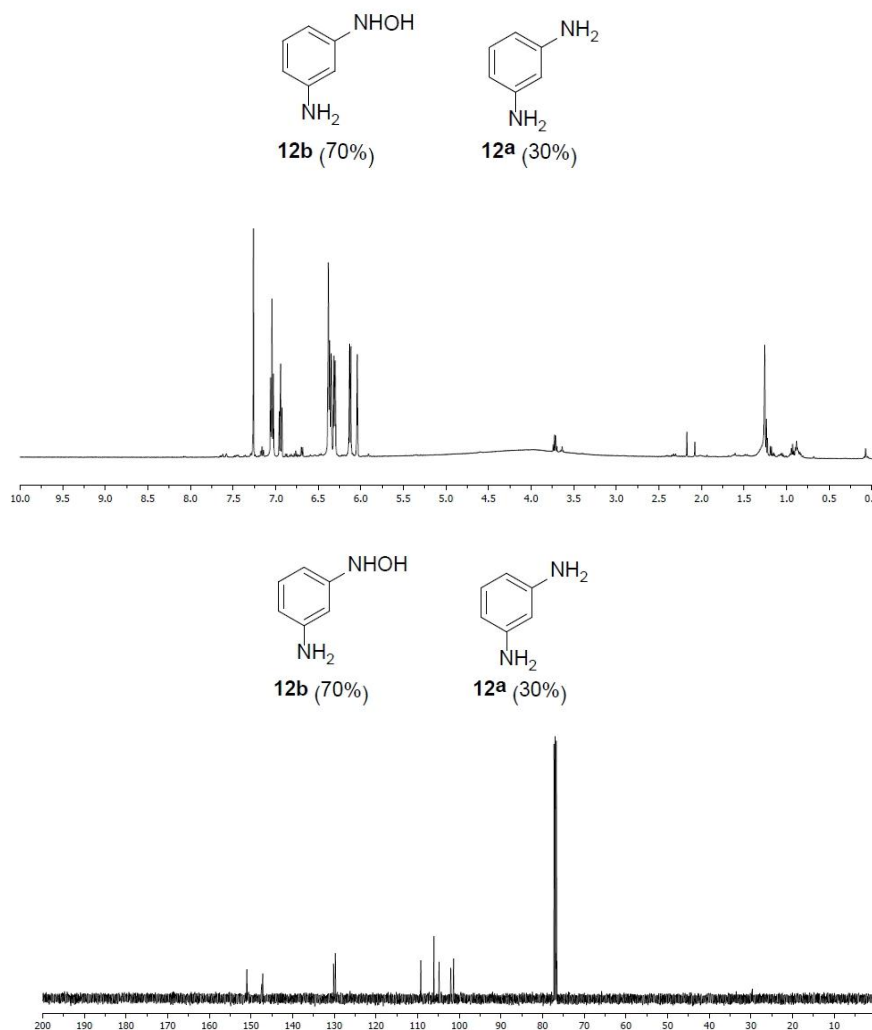

## References

1. Lowry, T.H.; Richardson, K.S. *Mechanism and Theory in Organic Chemistry*, 3rd ed.; Harper and Row Inc.: New York, NY, USA, 1987.
2. Sharma, U.; Verma, P.K.; Kumar, N.; Kumar, V.; Bala, M.; Singh, B. Phosphane-free green protocol for selective nitro reduction with an Iron-based catalyst. *Chem. Eur. J.* **2011**, *17*, 5903–5907.
3. Sharma, U.; Kumar, N.; Verma, P.K.; Kumar, V.; Singh, B. Zinc phthalocyanine with PEG-400 as a recyclable catalytic system for selective reduction of aromatic nitro compounds. *Green Chem.* **2012**, *14*, 2289–2293.
4. Dey, R.; Mukherjee, N.; Ahammed, S.; Ranu, B.C. Highly selective reduction of nitroarenes by iron(0) nanoparticles in water. *Chem. Commun.* **2012**, *48*, 7982–7984.
5. Rahaim, R.J.; Maleczka, R.E. Pd-catalyzed silicon hydride reductions of aromatic and aliphatic nitro groups. *Org. Lett.* **2005**, *7*, 5087–5090.
6. Chapman, N.; Conway, B.; O'Grady, F.; Wall, M.D. A convenient method to aniline compounds using microwave-assisted transfer hydrogenation. *Synlett* **2006**, *7*, 1043–1046.
7. Takenaka, Y.; Kiyosu, T.; Choi, J.-C.; Sakakura, T.; Yasuda, H. Selective synthesis of *N*-aryl hydroxylamines by the hydrogenation of nitroaromatics using supported platinum catalysts. *Green Chem.* **2009**, *11*, 1385–1390.
8. Boymans, E.H.; Witte, P.T.; Vogt, D. A study on the selective hydrogenation of nitroaromatics to *N*-arylhydroxylamines using a supported Pt nanoparticle catalyst. *Catal. Sci. Technol.* **2015**, *5*, 176–183.

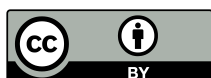

Supplement: nanomaterials-06-00054-s001.pdf [file nanomaterials-06-00054-s001.pdf]
